# Adult-Onset Atypical (Type 1) Diabetes

## Additional insights and differences with type 1A diabetes in a European Mediterranean population

EVA AGUILERA, MD<sup>1</sup>  
ROSER CASAMITJANA, MD, PHD<sup>2</sup>  
GUADALUPE ERCILLA, MD<sup>3</sup>

JOSEP ORIOLA, PHD,<sup>2</sup>  
RAMON GOMIS, MD, PHD<sup>1</sup>  
IGNACIO CONGET, MD, PHD<sup>1</sup>

**OBJECTIVE** — In 1997, the American Diabetes Association proposed two subcategories for type 1 diabetes: type 1A or immunomediated diabetes and type 1B or idiopathic diabetes characterized by negative  $\beta$ -cell autoimmunity markers, lack of association with HLA, and fluctuating insulinopenia. The aim of this study was to examine clinical characteristics,  $\beta$ -cell function, HLA typing, and mutations in maturity-onset diabetes of the young (MODY) genes in patients with atypical type 1 diabetes (type 1 diabetes diagnosed at onset, without pancreatic autoantibodies and fluctuating insulinopenia).

**RESEARCH DESIGN AND METHODS** — Eight patients with atypical type 1 diabetes (all men,  $30.7 \pm 7.6$  years) and 16 newly diagnosed age- and sex-matched patients with type 1A diabetes were studied retrospectively. Islet cell, GAD, tyrosine phosphatase and insulin antibodies, and basal and stimulated plasma C-peptide were measured at onset and after 1 year. HLA-DRB1-DQA1-DQB1 typing and screening for mutations in the HNF-1 $\alpha$  and HNF-4 $\alpha$  genes were performed from genomic DNA.

**RESULTS** — Atypical patients displayed significantly higher BMI and better  $\beta$ -cell function at onset and after 12 months. Three patients carried protective or neutral type 1 diabetes haplotypes, five patients displayed heterozygosity for susceptible and protective haplotypes, and seven patients showed Asp<sup>B57</sup>. We found a nondescribed variant Pro436Ser in exon 10 of the HNF-4 $\alpha$  gene in one atypical patient without susceptible haplotypes.

**CONCLUSIONS** — In our population, there are atypical forms of young adult-onset ketosis-prone diabetes initially diagnosed as type 1 diabetes, differing from type 1A diabetes in the absence of  $\beta$ -cell autoimmunity, persistent  $\beta$ -cell function capacity, fluctuating insulin requirements and ketosis-prone episodes, as well as clinical features of type 2 diabetes. Only one subgroup could be strictly classified as having type 1B diabetes. Additional information is still needed to improve our understanding of the mechanisms that finally lead to the disease.

*Diabetes Care* 27:1108–1114, 2004

In 1997, the American Diabetes Association proposed two subcategories for type 1 diabetes: type 1A or immunomediated diabetes and type 1B or idiopathic diabetes (1). Absence of  $\beta$ -cell autoimmunity markers and lack of association with HLA haplotypes predisposing diabetes mainly characterize the latter

subcategory. Individuals with this form of diabetes can develop ketosis/ketoacidosis and exhibit various degrees of insulin deficiency between episodes. Only a minority of patients with type 1 diabetes fall into this subcategory and most are of African-American or Asian origin (2–4). Recently, some authors have described this subcat-

egory in other ethnic groups, such as Native Americans and Hispanic Americans (5). The initial manifestation of the diabetes in these cases may be ketoacidosis similar to type 1A diabetes, although the course of the disease is unusual as insulin therapy is initially needed to maintain metabolic control and, after a variable period of time (usually within months), good control can be achieved with either diet or oral agents (5–9). On the other hand, these patients differ from those with type 1A diabetes because their physical characteristics are more typical of patients with type 2 diabetes; they are often obese or overweight at the time of diagnosis and, in most of the cases, there is a family history of type 2 diabetes (5).

Little is known about the pathogenesis of type 1B diabetes. It has been suggested that a mechanism other than the autoimmune destruction of  $\beta$ -cells produces  $\beta$ -cell failure. After insulin therapy is initiated, there is  $\beta$ -cell recovery, which is usually short in duration. Other factors such as glucotoxicity and lipotoxicity, as well as environmental factors, have also been involved (5,10,11).

Type 1B diabetes is highly common in North America, especially in areas with a patient population including African Americans and Latin Americans (10). Nevertheless, there is scarce information concerning the prevalence of type 1B diabetes in Caucasians (12,13). It is well known that a variable proportion of patients with newly diagnosed type 1 diabetes are negative for  $\beta$ -cell autoimmunity markers, and this proportion may oscillate depending on the population (14,15). These patients cannot be included in the subcategory of type 1B diabetes because they usually show clinical and  $\beta$ -cell function characteristics similar to those with positive pancreatic markers and HLA haplotypes predisposing diabetes (14,16–19).

Maturity-onset diabetes of the young (MODY) is a type of diabetes resulting from genetic defects of  $\beta$ -cell function characterized by an autosomal-dominant inheritance and early age of onset (1). Re-

From the <sup>1</sup>Endocrinology and Diabetes Unit, IDIBAPS (Institut d'Investigacions Biomèdiques August Pi i Sunyer), Hospital Clínic i Universitari, Barcelona, Spain; the <sup>2</sup>Hormonal Unit, IDIBAPS (Institut d'Investigacions Biomèdiques August Pi i Sunyer), Hospital Clínic i Universitari, Barcelona, Spain; and the <sup>3</sup>Immunology Unit, IDIBAPS (Institut d'Investigacions Biomèdiques August Pi i Sunyer), Hospital Clínic i Universitari, Barcelona, Spain.

Address correspondence and reprint requests to Dr. I. Conget, Endocrinology and Diabetes Unit, Villarroel 170, 08036 Barcelona, Spain. E-mail: iconget@clinic.ub.es.

Received for publication 22 October 2003 and accepted in revised form 19 January 2004.

**Abbreviations:** GADAb, GAD antibody; IAAb, insulin autoantibody; IA2Ab, tyrosine phosphatase antibody; MODY, maturity-onset diabetes of the young; SSO, specific-sequence oligonucleotide.

© 2004 by the American Diabetes Association.

cently, mutations in MODY genes have been described in subjects initially classified as having type 1 diabetes, lacking pancreatic autoantibodies and high-risk HLA haplotypes (20,21) and in African-American children with atypical diabetes (22). The most frequent subtype of MODY in our area is MODY 3, which is due to mutations in the HNF-1 $\alpha$  gene (23). MODY 1, with mutations in the HNF-4 $\alpha$  gene, is a rare disorder. These latter forms of MODY are associated with a progressive decrease in insulin secretion frequently resulting in the need for treatment with insulin (24,25).

The aim of the study was to examine the clinical characteristics,  $\beta$ -cell function, HLA typing, and presence of mutations in MODY genes in a group of Caucasian patients of Mediterranean origin with adult-onset atypical type 1 diabetes (type 1 diabetes diagnosed at onset, with absence of pancreatic autoantibodies and fluctuating insulinopenia).

## RESEARCH DESIGN AND METHODS

We retrospectively studied eight patients with newly diagnosed atypical type 1 diabetes. All of these patients presented with acute hyperglycemia or ketosis without any identifiable precipitating factor (ketonuria: ketones >150 mg/dl; nitroprusside reaction method) and were initially diagnosed and catalogued as having type 1 diabetes according to the National Diabetes Data Group criteria (26). None of them presented with diabetic ketoacidosis (plasma glucose >250–300 mg/dl, arterial pH <7.25, serum bicarbonate <15 mEq/l, and ketones >150 mg/dl). These patients were initially treated with insulin therapy during a variable period of time (usually <6 months after onset of the disease), but none were on insulin therapy 1 year after diagnosis. Five of these patients achieved good metabolic control with diet, and three were under oral agents (acarbose, metformin, or glymepiride). These patients showed negativity for pancreatic autoantibodies and were able to discontinue insulin completely for at least 2 years after diagnosis without development of ketonuria or symptoms of hyperglycemia. During follow-up, these patients showed recurrence of unprovoked ketosis episodes (including those who only presented symptomatic hyperglycemia at diagnosis) or symptomatic hyperglycemia requiring insulin therapy.

A group of 16 newly diagnosed age- and sex-matched type 1A diabetic subjects who had been treated in our Diabetes Unit were included as a control group.

All patients with newly diagnosed type 1 diabetes in our hospital are treated in an intensive manner with three or four daily doses of subcutaneous insulin: rapid-acting insulin before meals and NPH insulin before dinner/bedtime. They follow a diet adjusted to their age and BMI, and insulin doses are adjusted to maintain preprandial glucose between 3.9 and 7.0 mmol/l and postprandial glucose <10 mmol/l based on four to six daily capillary blood determinations. At onset of the disease, all subjects are included in a 5-day education program for individuals with newly diagnosed type 1 diabetes. Patients are seen by the same team every 2 weeks during the first 3 months and monthly thereafter until 12 months of follow-up. Patients are instructed concerning glucose goals and self-monitoring glucose control when necessary.

Glucagon tests and antibody measurements are determined initially and at month 12. HbA<sub>1c</sub> is determined by high-performance liquid chromatography (HA 8121; Menarini Diagnostici, Firenze, Italy) initially and at 12 months (normal range 3.4–5.5%).

## Autoantibody measurements

Islet cell antibodies were determined by an immunofluorescence technique (27). GAD antibodies (GADAbs) were determined by a radiobinding assay and were considered positive at >2 units/ml. The assay for GADAbs achieved 100% sensitivity and 100% specificity in the second GAD proficiency test. Tyrosine phosphatase antibodies (IA2Abs) titers were measured in a radiobinding assay and considered positive at >0.8 units/ml. The interassay and intra-assay coefficient of variation of IA2Abs determination were 7 and 5%, respectively. The upper limits of normal values for GADAbs and IA2Abs were defined by the 99th percentile of antibodies measured in 110 nondiabetic subjects without a family history of type 1 diabetes. Insulin autoantibodies (IAAbs) were measured using a radiobinding method. The upper normal limit of 1% was defined after analysis of 500 samples from healthy control subjects. The inter-assay coefficient of variation of IAAbs was 12%.

## Assessment of pancreatic $\beta$ -cell function

The glucagon test was performed in the absence of hypoglycemia in the previous 48 h and only when fasting blood glucose values were between 5.0 and 8.0 mmol/l. Plasma C-peptide measurements were performed basally and 2, 4, 6, 8, and 10 min after intravenous administration of 1 mg glucagon. C-peptide level was determined using a commercially available kit (Bick Santeg, Dietzenbach, Germany; limit of detection 0.033 mmol/l, intra-assay coefficient of variation 2.6%, inter-assay coefficient of variation 4.4%). Basal and maximal glucagon-stimulated values of C-peptide were used as  $\beta$ -cell function parameters.

## HLA typing

HLA-DRB1 typing was performed from genomic DNA. DNA was extracted from peripheral leukocytes. Genomic typing for class II genes was performed by amplification of exon 2 from the DRB1 gene followed by sequencing using commercial kits. Electrophoresis was run on an ALF express automated sequencer (Amersham Pharmacia Biotech, Uppsala, Sweden). Sequence data were processed automatically and evaluated manually. Typing was performed using the Pharmacia Typing Software (Alfwin 1.10/HLA sequityper 2.00 Software) comparing sequences with the manufacturer's database (updated July 2001). In case of ambiguities to assign the allele specificity, high-resolution specific-sequence oligonucleoprobe (SSO) typing was performed (Dynal, Madrid, Spain). The DQA1 and DQB1 alleles were defined by SSOs. The latest recommendations of the World Health Organization committee for factors of the HLA system were employed using four digits (28). For the assignment of alleles as "antigens," only two digits were used. The presence of susceptibility or resistance/neutral HLA-DQ genotypes and Asp<sup>B57</sup> as a protective factor (susceptibility means increased diabetes relative risk, resistance means decreased relative risk, and neutral means neither susceptibility nor resistance) was also analyzed according to the literature (29,30).

## Screening for mutations in the HNF-1 $\alpha$ and HNF-4 $\alpha$ genes

DNA was isolated from peripheral leukocytes. We investigated the 12 exons (1A-1B-1C and exons 2–10) of the HNF-4 $\alpha$

Table 1—Sequences of new combinations of primers for amplification of HNF-4 $\alpha$ 

| Region  | Forward primer (5'-3') | Reverse primer (5'-3') | Product size (bp) |
|---------|------------------------|------------------------|-------------------|
| Exon 1A | GGCGTGGAGGCAGGGAGAAT   | GCCTGTAGGACCAACCTACC   | 263               |
| Exon 1C | TGGCCGACTACAGTGCTGCAC  | CCTTGCCGTCTCTCTGAACC   | 486               |
| Exon 3  | CCTAGTTCTGTCCTAAGAGG   | GTTGTAAATGACTGTCGGGG   | 234               |

gene using PCR. The primers have been previously described, except in the case of exons 1A-1C-3, for which we used a new combination of primers (31,32) (Table 1). The 10 exons of the HNF-1 $\alpha$  gene were studied using PCR with previously described primers (33,34). The PCR conditions were denaturation at 94°C for 5 min followed by 35 cycles of denaturation at 96° for 30 s, annealing for 30 s at different temperatures (54° for exons 1A-1C-3-9 of the HNF-4 $\alpha$  gene, 58° for exons 1B-2-4-5-6-7-8-10 of the HNF-4 $\alpha$  gene, and 62° for all of the exons of the HNF-1 $\alpha$  gene), and extension at 72°C for 30 s, with a final extension at 72°C for 5 min. Each reaction contained DMSO (4%) in the case of exons 1A-1C-3 of the HNF-4 $\alpha$  gene and exons 1 and 4 of the HNF-1 $\alpha$  gene. PCR products of exons 1C, 2, 3, and 8 of the HNF-4 $\alpha$  gene and of exons 1, 2, and 4 of the HNF-1 $\alpha$  gene were cut into smaller fragments by restriction enzymes before single-strand conformational polymorphism (SSCP) analysis. The restriction enzymes used were *MspI* for exon 1C, *RsaI* for exon 2, *HaeIII* for exon 3, and *HinfI* for exon 8 of the HNF-4 $\alpha$  gene and *MspI* for exon 1, *PstI* for exon 2, and *HhaI* for exon 4 of the HNF-1 $\alpha$  gene. These restriction sites were located in intron se-

quences. The samples with bands with abnormal mobility were studied by automated sequencing.

### Statistical analysis

Results are presented as means  $\pm$  SD. Comparisons between the two groups were performed using Mann-Whitney *U* test for quantitative variables. Comparisons between proportions were performed using  $\chi^2$  test. A *P* value  $<0.05$  was considered statistically significant. All statistical calculations were performed by the Statistical Package for Social Science (SPSS) for personal computers (SPSS, Chicago, IL).

## RESULTS

### Clinical characteristics, metabolic control, and $\beta$ -cell function

The clinical, metabolic, and  $\beta$ -cell function characteristics of the two groups of subjects at baseline are shown in Table 2. There were no differences between the two groups in terms of duration of symptoms, insulin requirements, or HbA<sub>1c</sub> levels. The type of onset was predominantly ketosis in atypical subjects, being ketoacidosis in type 1A diabetic subjects. Subjects with atypical type 1 diabetes

displayed a higher BMI; these differences were statistically significant. These patients also showed significantly higher levels of basal and maximal C-peptide. The characteristics of each of the atypical patients at the onset of the disease are shown in Table 3.

The characteristics of both groups of patients 12 months after onset of the disease are shown in Table 4. Patients with atypical type 1 diabetes had significantly higher levels of basal and maximal C-peptide compared with type 1A diabetic subjects.

### Pancreatic autoantibodies

Considering the frequency of pancreatic autoantibodies among type 1A diabetic subjects at onset, 12 of 16 subjects were positive for islet cell antibodies (75%), 11 of 16 were positive for GADAb (68.7%), 9 of 16 were positive for IA2Ab (56.2%), and 5 of 16 were positive for IAAb (31.2%). As mentioned above, all atypical patients were negative for all pancreatic autoantibodies tested on at least two occasions.

### HLA

There were differences between the two groups in HLA typing: type 1A diabetic patients showed a major proportion of HLA haplotypes predisposing diabetes (30). A total of 85% of type 1A diabetic subjects carried DRB1\*03/\*04 versus 62% of patients with atypical type 1 diabetes (*P* = 0.45). The most frequent haplotype in both groups was DRB1\*0301-DQA1\*0501-DQB1\*0201 (DQ2) (five of eight patients in the atypical group showed this haplotype versus 8 of 16 patients with type 1A diabetes, *P* = 0.80). None of the type 1A diabetic patients displayed haplotype HLA-DR11, whereas five of eight patients with atypical type 1 diabetes showed it in the haplotype (Table 5 shows HLA haplotypes of patients with atypical type 1 diabetes); this difference was statistically significant (*P* < 0.01). Five of eight patients with atypical type 1 diabetes displayed susceptible type 1 diabetes haplotypes, but in all cases except one, these haplotypes were in combination with a type 1 diabetes-resistant HLA haplotype and/or with the presence of Asp<sup>B57</sup>. Three patients of the atypical group carried resistant or neutral type 1 diabetes haplotypes and Asp<sup>B57</sup> (30).

Table 2—Baseline characteristics of the study groups

|                                                                     | Atypical type 1 diabetes | Type 1A diabetes | <i>P</i> |
|---------------------------------------------------------------------|--------------------------|------------------|----------|
| n                                                                   | 8                        | 16               |          |
| Age (years)                                                         | 30.7 $\pm$ 7.6           | 28.0 $\pm$ 5.5   | NS       |
| Sex (men/women)                                                     | 8/0                      | 16/0             |          |
| Family history of type 2 diabetes                                   | 7/8                      | 8/16             | NS       |
| BMI (kg/m <sup>2</sup> )                                            | 28.1 $\pm$ 4.7           | 22.9 $\pm$ 4.4   | 0.016    |
| Duration of symptoms (weeks)                                        | 12.0 $\pm$ 18.0          | 9.2 $\pm$ 11.7   | NS       |
| Loss of weight (kg/week)                                            | 1.4 $\pm$ 1.5            | 1.4 $\pm$ 1.1    | NS       |
| HbA <sub>1c</sub> (%)                                               | 11.1 $\pm$ 1.5           | 11.4 $\pm$ 2.1   | NS       |
| Clinical presentation at onset (hyperglycemia/ketosis/ketoacidosis) | 2/6/0                    | 2/5/9            | 0.02     |
| Insulin dose (units/kg)                                             | 0.6 $\pm$ 0.1            | 0.7 $\pm$ 0.2    | NS       |
| Basal C-peptide (nmol/l)                                            | 0.51 $\pm$ 0.22          | 0.22 $\pm$ 0.08  | 0.001    |
| Maximally stimulated C-peptide (nmol/l)                             | 1.12 $\pm$ 0.27          | 0.51 $\pm$ 0.22  | 0.000    |

Data are means  $\pm$  SD.

Table 3—Characteristics of patients with atypical type 1 diabetes at onset of the disease

|           | Age (years) | BMI (kg/m <sup>2</sup> ) | HbA <sub>1c</sub> (%) | Onset | Insulin dose (units/kg) | Basal C-peptide (nmol/l) | Maximal C-peptide (nmol/l) |
|-----------|-------------|--------------------------|-----------------------|-------|-------------------------|--------------------------|----------------------------|
| Patient 1 | 21          | 34.4                     | 11.5                  | H     | 0.61                    | 0.79                     | 1.45                       |
| Patient 2 | 29          | 26                       | 11.4                  | K     | 0.47                    | 0.49                     | 1.15                       |
| Patient 3 | 30          | 26.4                     | 11.5                  | K     | 0.60                    | 0.49                     | 1.29                       |
| Patient 4 | 42          | 25.5                     | 9.5                   | K     | 0.72                    | 1.02                     | 1.58                       |
| Patient 5 | 20          | 36                       | 9.1                   | K     | 0.40                    | 0.31                     | 0.92                       |
| Patient 6 | 37          | 27.9                     | 13.5                  | K     | 0.71                    | 0.26                     | 0.69                       |
| Patient 7 | 31          | 26.5                     | 9.7                   | K     | 0.57                    | 0.76                     | 1.29                       |
| Patient 8 | 36          | 22                       | 11.6                  | H     | 0.60                    | 0.40                     | 1.22                       |

Data are means  $\pm$  SD. H, hyperglycemia; K, ketosis.

### Mutations in HNF-1 $\alpha$ and HNF-4 $\alpha$ genes

After analysis of the 10 exons of the HNF-1 $\alpha$  gene, we did not find mutations in any group. When we studied the HNF-4 $\alpha$  gene, we found a nondescribed variant in codon 436 of exon 10 resulting in a single amino acid substitution (proline by serine) in one of the subjects with atypical type 1 diabetes (Table 3, patient 1). None of the subjects in the type 1A diabetes group showed this variant, and it was absent in DNA of 80 control subjects. Unfortunately, it was impossible to perform a family study of the patient with the variant.

**CONCLUSIONS**— Our study suggests that atypical forms of adult-onset type 1 diabetes may be detected among subjects of Caucasian origin in a Mediterranean area. Despite an initial clinical presentation compatible with type 1 diabetes, they differ in terms of the absence of autoimmunity, persistent  $\beta$ -cell function capacity, and fluctuating insulin requirements and ketosis-prone episodes. The identification of such a group of subjects is important not only for correct classification but also with regard to treatment options and prognosis. Nevertheless, strictly speaking (absence of type 1 diabetic HLA-predisposing haplotypes), there is only one subgroup of patients with adult-onset atypical type 1 diabetes who fully fit the American Diabetes Association description of type 1B diabetes.

Patients with adult-onset atypical type 1 diabetes represent a very small minority among all new diagnoses of type 1 diabetes in our area (<10%), in contrast to data obtained in North America, mainly in adult obese individuals of African-American ancestry (5). Although

there are some reports from other ethnic groups, data concerning a European population is very scarce (12,13). Although all of the subjects included in our study were initially classified by clinicians as having type 1A diabetes and were treated as such, they displayed some characteristics not usually associated with the most typical form of the disease. Mean age at diagnosis was higher than usually described in type 1A diabetes, as was BMI when compared with age- and sex-matched control subjects, being >90% above normal weight at diagnosis. As in other studies reporting a significant male predominance (5), all patients with adult-onset atypical type 1 diabetes included in our study were men. This is in contrast with a 2:1 man-to-woman ratio usually observed in type 1A diabetic subjects aged 15–35 years in our population (19). After correction of initial metabolic disturbances, patients with adult-onset atypical type 1 diabetes showed a higher basal C-peptide and  $\beta$ -cell response to glucagon when compared with type 1 diabetic control subjects, and this difference increased after 12 months of follow-up. Therefore, the initial impairment of  $\beta$ -cell function unable to maintain glucose and ketone production within normal levels is

a reversible phenomenon in adult-onset atypical type 1 diabetes, although it may relapse later on after diagnosis.

In our study, we also included the examination of type 1A diabetic HLA risk alleles (30), because according to the Expert Committee on the Diagnosis and Classification of Diabetes of the American Diabetes Association, idiopathic type 1B diabetes should be non-HLA associated. In this context, and from a rigorous point of view, only three of eight patients with adult-onset atypical type 1 diabetes included in the study could be ascribed in the type 1B diabetes subcategory because none carried HLA antigens associated with type 1A diabetes. These patients carried protective or neutral type 1A diabetes HLA haplotypes, and the presence of Asp<sup>657</sup> residue was identified in HLA-DQ analysis in all of them. A striking feature was that the DRB1\*11 haplotype was also present in all of the subjects in this subgroup, although this haplotype is not very common among type 1A diabetic subjects or in a normal control population in our country (3 and 7%, respectively) (35). In terms of HLA, all but one of the remaining five subjects with adult-onset atypical type 1 diabetes carried type 1A diabetic risk HLA haplotypes in combination with

Table 4—Characteristics of the study groups after 12 months of follow-up

|                                       | Atypical type 1 diabetes | Type 1A diabetes | P     |
|---------------------------------------|--------------------------|------------------|-------|
| Number of subjects                    | 8                        | 16               |       |
| BMI (kg/m <sup>2</sup> )              | 27.5 $\pm$ 3.5           | 22.9 $\pm$ 4.4   | 0.047 |
| HbA <sub>1c</sub> (%)                 | 5.1 $\pm$ 0.6            | 5.7 $\pm$ 0.8    | 0.052 |
| Insulina dose (units/kg)              | 0                        | 0.4 $\pm$ 0.2    | 0.000 |
| Basal C-peptide (nmol/l)              | 0.89 $\pm$ 0.35          | 0.21 $\pm$ 0.10  | 0.000 |
| Maximum stimulated C-peptide (nmol/l) | 1.59 $\pm$ 0.43          | 0.41 $\pm$ 0.19  | 0.000 |

Data are means  $\pm$  SD.



Table 5—HLA haplotypes in patients with atypical type 1 diabetes

|           | DRB1-DQA1-DQB1                | DQB57 | Susceptibility      | Resistance                               |
|-----------|-------------------------------|-------|---------------------|------------------------------------------|
| Patient 1 | 0101-0101-0501/1104-0505-0301 | D/V   | —                   | DQA1*0505-DQB1*0301 + Asp <sup>B57</sup> |
| Patient 2 | 1302-0102-0604/1101-0501-0301 | D/V   | —                   | DQA1*0501-DQB1*0301 + Asp <sup>B57</sup> |
| Patient 3 | 1104-0505-0202/1201-0503-0302 | D/A   | —                   | Asp <sup>B57</sup>                       |
| Patient 4 | 0403-0301-0302/1102-0501-0301 | D/A   | DQA1*0301-DQB1*0302 | DQA1*0501-DQB1*0301 + Asp <sup>B57</sup> |
| Patient 5 | 0301-0501-0201/0401-0303-0301 | D/A   | DQA1*0501-DQB1*0201 | Asp <sup>B57</sup>                       |
| Patient 6 | 0301-0501-0201/0101-0501-0101 | D/V   | DQA1*0501-DQB1*0201 | Asp <sup>B57</sup>                       |
| Patient 7 | 0301-0501-0201/1104-0501-0301 | D/A   | DQA1*0501-DQB1*0201 | DQA1*0501-DQB1*0301 + Asp <sup>B57</sup> |
| Patient 8 | 0301-0501-0201/1601-0102-0502 | A/S   | DQA1*0501-DQB1*0201 | —                                        |

A, alanine; D, aspartic; S, serine; V, valine.

protective haplotypes and/or Asp<sup>B57</sup>. In fact, the presence of a higher proportion of HLA-predisposing alleles in subjects with atypical forms of diabetes in comparison to nondiabetic control subjects has already been described (7,36). Considering this, and despite similar clinical and metabolic characteristics when compared with the former subgroup of subjects, these patients cannot strictly be included in the type 1B diabetes definition. Nonetheless, we cannot explain the exact role the combination of susceptible/protective Asp<sup>B57</sup> HLA alleles plays in the pathogenesis of diabetes in this subgroup of subjects. However, HLA-DQB1 codon 57 is a determinant site for peptide binding and for antigen-specific T-cell stimulation and HLA-DQ molecules helping B-cells to produce antibodies (29,37).

The pathophysiologic mechanisms determining atypical forms of type 1 diabetes remain unsolved and may differ, depending on the ethnic background. We herein study the possible role of MODY genes to explain adult-onset atypical type 1 diabetes. In this sense, there have been some descriptions of mutations in genes responsible for MODY in subjects with atypical/idiopathic type 1 diabetes (20–22). We examined regions encoding for HNF-1α (MODY3) and HNF-4α (MODY1) genes in our group of patients with adult-onset atypical type 1 diabetes. We found a new variant (Pro436Val) in exon 10 of HNF-4α in one patient with adult-onset atypical type 1 diabetes without type 1A diabetic HLA-predisposing alleles. There was no history of diabetes in his family, and it was not possible to have access to any family member to analyze the presence or absence of the variant and to study their oral glucose tolerance. Functional tests also would have helped us to determine the role of the mutation in

vitro by a transcriptional activity assay. Unfortunately, we could not perform the experiment, and thus, the contribution of this HNF-4α variant to the pathogenesis of diabetes remains only speculative and warrants further investigation.

No evidence of autoimmune destruction of insulin-producing cells has been reported or considered as a possible cause of adult-onset atypical type 1 diabetes, at least as it is described for type 1A diabetes. In fact, data could suggest that a fluctuating β-cell dysfunction in concert with changes in insulin resistance could result in a different clinical picture in this group of subjects. Despite the fact that an insulin secretion defect caused insulinopenia, hyperglycemia, and ketosis, in our subjects, the clinical picture clearly contrasts with the idiopathic diabetes forms described in a Japanese population characterized by abrupt and fulminant onset and high serum pancreatic enzyme concentration (38).

In agreement with Sobngwi and Gautier (39), in our opinion, adult-onset atypical type 1 diabetes could be more closely related to type 2 diabetes than type 1 diabetes. Age at onset, around the thirties, was higher than that observed in type 1A diabetes and could be comparable to that of young type 2 diabetic subjects, mainly in some ethnic groups with the increasing problem of obesity in the western world. Likewise, overweight/obesity was very common at onset, and the BMI remained significantly higher after 12 months of follow-up when compared with type 1A diabetic control subjects. Therefore, this group of patients with atypical type 1 diabetes probably has a young adult-onset ketosis-prone atypical form of type 2 diabetes that affects a predisposed population with a transitory nonprecipitating impairment of insulin

secretion, leading to hyperglycemia and ketosis. It may be related to glucose desensitization and an outstanding sensitivity to glucotoxicity or lipotoxicity. However, all of these possibilities remain to be fully elucidated.

In summary, our data suggest that atypical forms of young adult-onset ketosis-prone diabetes initially diagnosed as type 1 diabetes may be detected among subjects of Caucasian origin in a Mediterranean area. Despite having an initial clinical presentation compatible with type 1 diabetes, these patients differ in terms of no evidence of β-cell autoimmunity, persistent β-cell function capacity, fluctuating insulin requirements, and ketosis-prone episodes, as well as clinical features of type 2 diabetes. Among this group of subjects, only one subgroup could be strictly classified as type 1B diabetes. With respect to the pathophysiology of this form of diabetes, additional information is still needed to improve our understanding of the mechanisms that finally lead to the disease.

**Acknowledgments**— This study was supported by a grant (PI020318) from the “Ministerio de Sanidad y Consumo” of Spain. E.A. is the recipient of a grant from the Fundació Clinic per a la Recerca Biomèdica and from the Fundació Universitària Agustí Pedro i Pons.

We thank the nursing staff of the Endocrinology Unit of Hospital Clinic i Universitari (Barcelona) for their technical assistance and Belen Juarez for HLA typing.

References

1. The Expert Committee on the Diagnosis and Classification of Diabetes Mellitus: Report of the Expert Committee on the Diagnosis and Classification of Diabetes Mellitus. *Diabetes Care* 20:1183–1197, 1997

2. Winter WE, MacLiley W, Clarke DW, Kappy MS, Spillar RP: Maturity onset diabetes of youth in black Americans. *N Engl J Med* 316:285–291, 1987
3. Tan KCB, Mackay IR, Zimmet PZ, Hawkins BR, Lam KSL: Metabolic and immunological features of Chinese patients with atypical diabetes mellitus. *Diabetes Care* 23:335–338, 2000
4. Umpierrez GE, Casals MM, Gebhart SS, Mixon PS, Clark WS, Phillips LS: Diabetic ketoacidosis in obese African-American. *Diabetes* 44:790–795, 1995
5. Piñero-Piloña A, Avilés-Santa L, Litonjua P, Raskin P: Idiopathic type 1 diabetes in Dallas, Texas. *Diabetes Care* 24:1014–1018, 2001
6. McFarlane SI, Chaiken RL, Hirsch S, Harrington P, Lebovitz HE, Banerji MA: Near-normoglycaemic remission in African-Americans with type 2 diabetes mellitus is associated with recovery of beta cell function. *Diabet Med* 18:10–16, 2001
7. Banerji MA, Chaiken RL, Huey H, Toumi T, Norin AJ, Mackay LR, Rowley MJ, Zimmet PZ, Lebovitz HE: GAD antibody negative NIDDM in adult subjects with diabetes ketoacidosis and increased frequency of human leukocyte antigen DR3 and DR4, Flatbush Diabetes. *Diabetes* 43:741–745, 1994
8. Banerji MA, Chaiken RL, Lebovitz HE: Long-term normoglycemic remission in black newly diagnosed IDDM subjects. *Diabetes* 45:337–341, 1996
9. Banerji MA, Chaiken RL, Lebovitz HE: Prolongation of near-normoglycemic remission in black NIDDM subjects with chronic low-dose sulfonylurea treatment. *Diabetes* 44:466–470, 1995
10. Piñero-Piloña A, Raskin P: Idiopathic type 1 diabetes. *J Diabetes Complications* 15:328–335, 2001
11. Unger RH: Lipotoxicity in the pathogenesis of obesity-dependent NIDDM: genetic and clinical implications. *Diabetes* 44:863–870, 1995
12. Tiberti C, Buzzetti R, Anastasi E, Dotta F, Vasta M, Petrone A, Cervoni M, Torresi P, Vecci E, Mulatri G, Di Mario U: Autoantibody negative new onset type 1 diabetic patients lacking high risk HLA alleles in a Caucasian population: are these type 1B diabetes cases? *Diabet Metab Res Rev* 16:8–14, 2000
13. Borg H, Arnqvist HJ, Björk E, Bolinder J, Eriksson JW, Nyström L, Jeppsson JO, Sundkvist G: Evaluation of the new ADA and WHO criteria for classification of diabetes mellitus in young adult people (15–34 yrs) in the Diabetes Incidence Study in Sweden (DISS) *Diabetologia* 46:173–181, 2003
14. Törn C, Landin-Olsson M, Lernmark Å, Palmer JP, Arnqvist HJ, Blohmé G, Lithner F, Littorin B, Nyström L, Scherstén B, Sundkvist G, Wibell L, Östman J: Prognostic factors for the course of  $\beta$ -cell function in autoimmune diabetes. *J Clin Endocrinol Metab* 85:4619–4623, 2000
15. Sabbah E, Savola K, Ebeling T, Kulmala P, Vahasalo P, Ilonen J, Salmela P, Knip M: Genetic, autoimmune, and clinical characteristics of childhood-and adult-onset type 1 diabetes. *Diabetes Care* 23:1326–1332, 2000
16. Borg H, Gottsäter A, Landin-Olsson M, Fernlund P, Sundkvist G: High levels of antigen-specific islet antibodies predict future  $\beta$ -cell failure in patients with onset of diabetes in adult age. *J Clin Endocrinol Metab* 86:3032–3038, 2001
17. Gottsäter A, Landin-Olsson M, Lernmark A, Fernlund P, Sundkvist G, Hagopian WA: Glutamate decarboxylase antibody levels predict rate of  $\beta$ -cell decline in adult-onset diabetes. *Diabetes Res Clin Pract* 27:133–140, 1995
18. Weets I, Siraux V, Daubresse JC, De Leeuw IH, Féry F, Keymeulen B, Krzenkowski G, Letiexhe M, Mathieu C, Nobels F, Rottiers R, Scheen A, Van Gaal L, Schuit FC, Van der Auwera B, Rui M, De Pauw P, Kaufman L, Goris FK: Relation between disease phenotype and HLA-DQ genotype in diabetic patients diagnosed in early adulthood. *J Clin Endocrinol Metab* 87:2597–2605, 2002
19. Aguilera E, Recasens M, Morinigo RA, Casamitjana R, Oriola J, Ercilla G, Conget I: Clinical, metabolic, immunological and genotypic characteristics in non-pediatric patients with type 1 A diabetes mellitus: onset and short term prognosis. *Med Clin (Barc)* 120:121–124, 2003
20. Moller AM, Dalgard LT, Pociot F, Nerup J, Hansen T, Pedersen O: Mutations in the hepatocyte nuclear factor-1 $\alpha$  in Caucasian families originally classified as having type 1 diabetes. *Diabetologia* 41:1528–1531, 1999
21. Kawasaki E, Sera Y, Yamakawa K, Abe T, Ozaki M, Uotani S, Ohtsu N, Takino H, Yamasaki H, Yamaguchi Y, Matsuura N, Eguchi K: 2000 Identification and functional analysis of mutations in the hepatocyte nuclear factor-1 $\alpha$  gene in anti-islet autoantibody-negative Japanese patients with type 1 diabetes. *J Clin Endocrinol Metab* 85:331–335, 2000
22. Boutin P, Gresh L, Cisse A, Hara M, Bell G, Babu G, Eisenbarth G, Froguel P: Missense mutation Gly574Ser in the transcription factor HNF-1 alpha is a marker of atypical diabetes mellitus in African-American children. *Diabetologia* 42:380–381, 1999
23. Costa A, Bescós M, Velho G, Chèvre JC, Vidal J, Sesmilo G, Bellanné-Chantelot C, Froguel P, Casamitjana R, Rivera-Fillat F, Gomis R, Conget I: Genetic and clinical characterisation of maturity-onset diabetes of the young in Spanish families. *Eur J Endocrinol* 142:380–386, 2000
24. Hattersley AT: Maturity-onset diabetes of the young: clinical heterogeneity explained by genetic heterogeneity. *Diabet Med* 15:15–24, 1998
25. Lehto M, Tuomi T, Mahtani MM, Widen E, Forsblom C, Sarelin L, Gullstrom M, Isomaa B, Lehtovirta M, Hyrkko A, Kaninen T, Orho M, Manley S, Turner RC, Brettn T, Kirby A, Thomas J, Duyk G, Lander E, Taskinen MR, Groop L: Characterization of the MODY 3 phenotype: early-onset diabetes caused by an insulin secretion defect. *J Clin Invest* 99:582–591, 1997
26. National Diabetes Data Group: Classification and diagnosis of diabetes mellitus and other categories of glucose intolerance. *Diabetes* 28:1039–1057, 1979
27. Rodriguez-Villar C, Conget I, Casamitjana R, Ercilla G, Gomis R: Effects of insulin administration in a group of high-risk, non-diabetic, first-degree relatives of type 1 diabetic patients: an open pilot trial. *Diabet Med* 16:160–163, 1999
28. Bodmer JG, Marsch SG, Albert DE, Bodmer WF, Bontrop RE, Charron D, Dupont B, Erlich HA, Mach B, Mayr WR, Parham P, Petersdorf EW, Sasazuki T, Schreuder GM, Strominger JL, Svegaard A, Terasaki PI: Nomenclature for factors of the HLA system, 1994. *Hum Immunol* 41:1–20, 1994
29. Lee KH, Wucherpfennig KW, Wiley DC: Structure of a human insulin peptide-HLA-DQ8 complex and susceptibility to type 1 diabetes. *Nat Immunol* 6:501–507, 2001
30. Moustakas AK, Papadopoulos GK: Molecular properties of HLA-DQ alleles conferring susceptibility to or protection from insulin-dependent diabetes mellitus: keys to the fate of islet  $\beta$ -cells. *Am J Med Genet* 115:37–47, 2002
31. Yamagata K, Furuta H, Oda N, Kaisaki PJ, Menzel S, Cox NJ, Fajans SS, Signorini S, Stoffel M, Bell GI: Mutations in the hepatocyte nuclear factor-4 $\alpha$  gene in maturity-onset diabetes of the young (MODY 1). *Nature* 384:458–460, 1996
32. Rissanen J, Wang H, Miettinen R, Kärkäinen P, Kekäläinen P, Mykkanen L, Kuusisto J, Karhapää P, Niskanen L, Uusitupa M, Laakso M: Variants in the hepatocyte nuclear factor-1 $\alpha$  and -4 $\alpha$  genes in Finnish and Chinese subjects with late-onset type 2 diabetes. *Diabetes Care* 23:1533–1538, 2000
33. Yamagata K, Oda N, Kaisaki PJ, Menzel S, Furuta H, Vaxillaire M, Southam L, Cox RD, Lathrop GM, Boriraj VV, Chen X, Cox NJ, Oda Y, Yano H, Le Beau MM, Yamada S, Nishigori H, Takeda J, Fajans SS, Hattersley AT, Iwasaki N, Hansen T, Ped-

- ersen O, Polonsky KS, Signorini S, Bell GI: Mutations in the hepatocyte nuclear factor-1 $\alpha$  gene in maturity-onset diabetes of the young (MODY 3). *Nature* 384:455–458, 1996
34. Kaisaki PJ, Menzel S, Lindner T, Oda N, Rjasanowski I, Sahm J, Meincke G, Schulze J, Schmechel H, Petzold C, Hellmuth M, Ledermann HM, Sachse G, Boriraj VV, Menzel R, Kerner W, Turner RC, Yamagata K, Bell GI: Mutations in the hepatocyte nuclear factor-1 $\alpha$  gene in MODY and early-onset NIDDM. *Diabetes* 46:528–535, 1997
35. Escribano-de-Diego J, Sánchez-Velasco P, Luzuriaga C, Ocejo-Vinyals JG, Paz-Miguel JE, Leyva-Cobián F: HLA class II immunogenetics and incidence of insulin-dependent diabetes mellitus in the population of Cantabria (Northern Spain). *Hum Immunol* 60:990–1000, 1999
36. Sobngwi E, Vexiau P, Levy V, Lepage V, Mauvais-Jarvis F, Leblanc H, Mbanyat JC, Gautier JF: Metabolic and immunogenetic prediction of long-term insulin remission in African patients with atypical diabetes. *Diabet Med* 19:832–835, 2002
37. Kwok WW, Domeier MF, Johnson ML, Nepom GT, Koelle DM: HLA-DQB1 codon 57 is critical for peptide binding and recognition. *J Exp Med* 183:1253–1258, 1996
38. Imagawa A, Hanafusa T, Miyagawa J, Matsuzawa Y: A novel subtype of type 1 diabetes mellitus characterized by a rapid onset and an absence of diabetes-related antibodies: Osaka IDDM Study Group. *N Engl J Med* 342:301–307, 2000
39. Sobngwi E, Gautier JF: Adult onset idiopathic type I or ketosis-prone type II diabetes: evidence to revisit diabetes classification. *Diabetologia* 45:283–285, 2002
